# Supplementary material for: Copy number variations primed lncRNAs deregulation contribute to poor prognosis in colorectal cancer
Source: publisher site journal article supplement (doi:10.18632/aging.102168), 2019-08-22
Supplement: Supplementary file [file aging-v11i16-102168-supplementary-material-SD1.pdf]

SUPPLEMENTARY FIGURES

Method Kaplan Meier

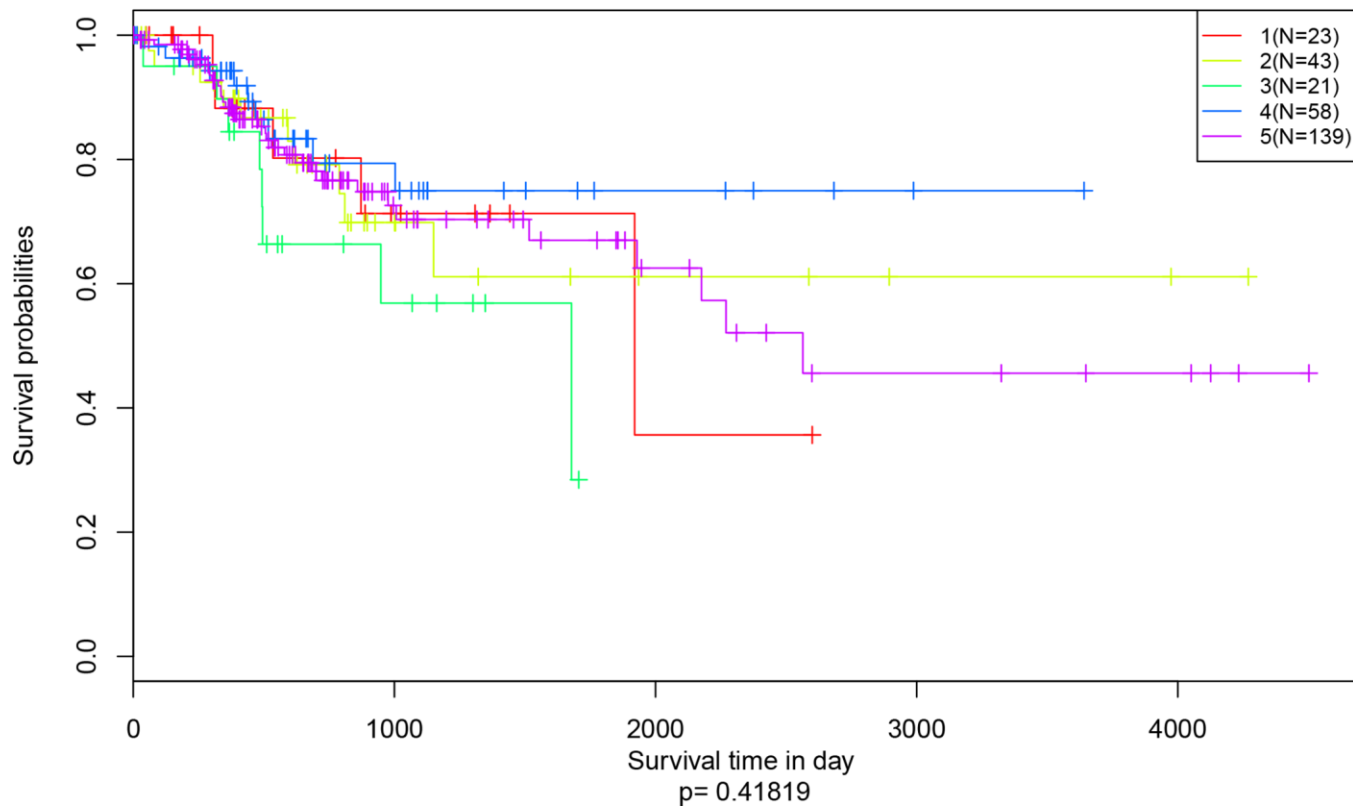

Supplementary Figure 1.

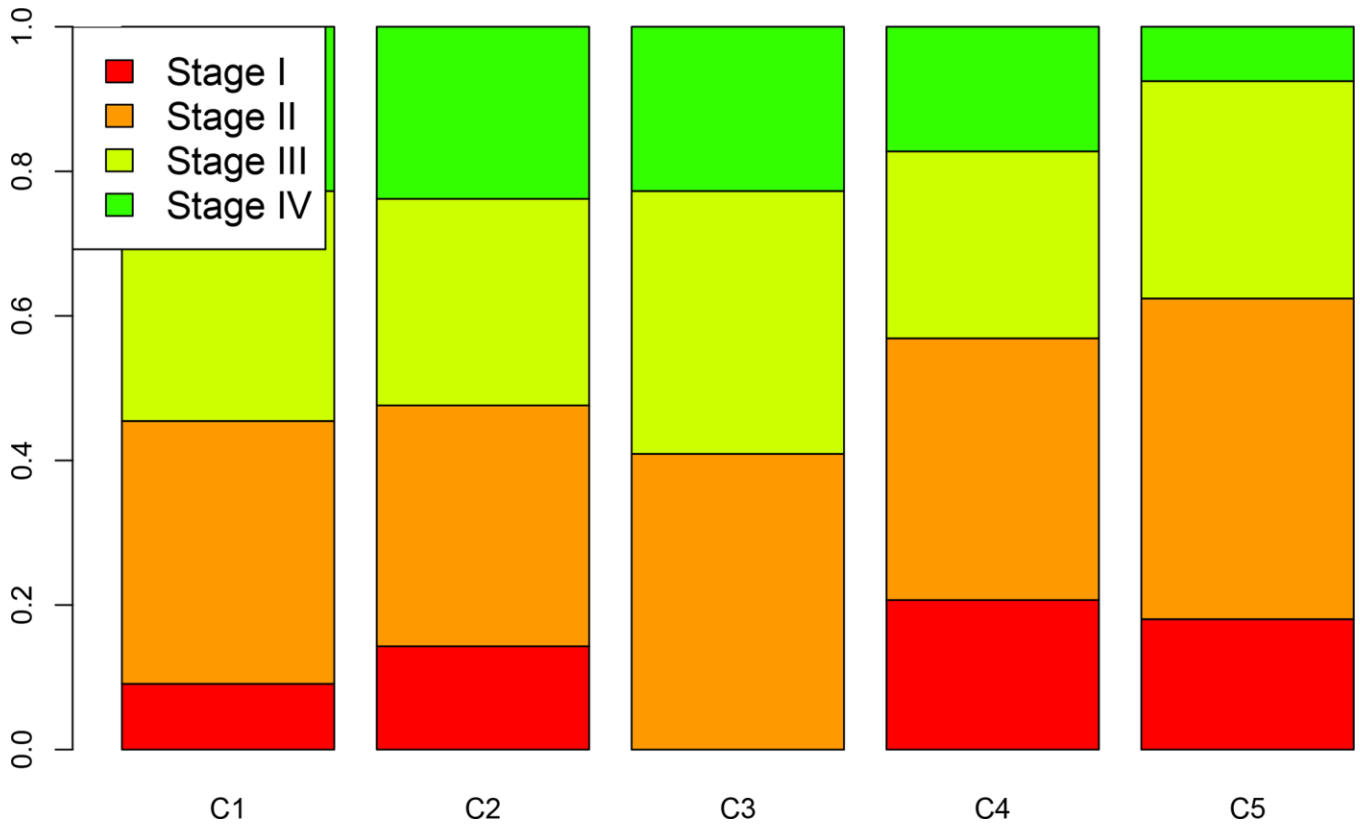

Supplementary Figure 2.
