# Supplementary material for: Copy number variations primed lncRNAs deregulation contribute to poor prognosis in colorectal cancer
Source: publisher site journal article supplement (doi:10.18632/aging.102168), 2019-08-22
Supplement: Supplementary file [file aging-v11i16-102168-supplementary-material-SD2.pdf]

## SUPPLEMENTARY TABLES

Please browse Full Text version to see the data of Supplementary Tables 1 and 2.

### Supplementary Table 1.

### Supplementary Table 2.

### Supplementary Table 3.

| ID       | Description            | GeneRatio | BgRatio  | pvalue   | p.adjust | qvalue   | geneID                                               | Count |
|----------|------------------------|-----------|----------|----------|----------|----------|------------------------------------------------------|-------|
| hsa05206 | MicroRNAs<br>in cancer | 11841     | 299/7466 | 0.001473 | 0.117837 | 0.117837 | VEGFA/MIR25/<br>MIR200A/MIR135B/<br>MIR200B/MIR199A1 | 6     |
| hsa04931 | Insulin<br>resistance  | 11749     | 107/7466 | 0.010498 | 0.419906 | 0.419906 | MLXIPL/OGT/CPT1B                                     | 3     |

Please browse Full Text version to see the data of Supplementary Table 4.

### Supplementary Table 4.

### Supplementary Table 5.

| ID       | Description                       | GeneRatio | BgRatio  | pvalue   | p.adjust | qvalue   | geneID                                 | Count |
|----------|-----------------------------------|-----------|----------|----------|----------|----------|----------------------------------------|-------|
| hsa04926 | Relaxin<br>signaling<br>pathway   | 26420     | 130/7466 | 0.008169 | 0.38588  | 0.365784 | RLN1/ADCY3/<br>PLCB4/RLN2/<br>GNG4     | 5     |
| hsa03022 | Basal<br>transcription<br>factors | 26359     | 45/7466  | 0.009133 | 0.38588  | 0.365784 | TAF4/GTF2F2/<br>GTF2IRD1               | 3     |
| hsa00510 | N-Glycan<br>biosynthesis          | 26359     | 49/7466  | 0.011538 | 0.38588  | 0.365784 | RPN2/ALG5/<br>MGAT5                    | 3     |
| hsa05110 | Vibrio<br>cholerae<br>infection   | 26359     | 50/7466  | 0.012191 | 0.38588  | 0.365784 | PLCG1/ADCY3/<br>ATP6V1C2               | 3     |
| hsa04713 | Circadian<br>entrainment          | 26390     | 96/7466  | 0.013566 | 0.38588  | 0.365784 | ADCY3/PLCB4/<br>CACNA1D/<br>GNG4       | 4     |
| hsa04310 | Wnt signaling<br>pathway          | 26420     | 149/7466 | 0.014186 | 0.38588  | 0.365784 | AXIN2/CSNK2A2/<br>TCF7/PLCB4/<br>NKD1  | 5     |
| hsa04916 | Melanogenesis                     | 26390     | 101/7466 | 0.016087 | 0.38588  | 0.365784 | ADCY3/TCF7/<br>PLCB4/ASIP              | 4     |
| hsa04934 | Cushing<br>syndrome               | 26420     | 154/7466 | 0.016163 | 0.38588  | 0.365784 | ADCY3/AXIN2/<br>TCF7/PLCB4/<br>CACNA1D | 5     |

|          |                                  |       |          |          |          |          |                                       |   |
|----------|----------------------------------|-------|----------|----------|----------|----------|---------------------------------------|---|
| hsa04725 | Cholinergic synapse              | 26390 | 112/7466 | 0.02262  | 0.390425 | 0.370091 | ADCY3/PLCB4/<br>CACNA1D/GNG4          | 4 |
| hsa04927 | Cortisol synthesis and secretion | 26359 | 64/7466  | 0.023557 | 0.390425 | 0.370091 | ADCY3/PLCB4/<br>CACNA1D               | 3 |
| hsa04724 | Glutamatergic synapse            | 26390 | 114/7466 | 0.023959 | 0.390425 | 0.370091 | ADCY3/PLCB4/<br>CACNA1D/GNG4          | 4 |
| hsa04137 | Mitophagy - animal               | 26359 | 65/7466  | 0.024529 | 0.390425 | 0.370091 | BCL2L1/ATG9B/<br>CSNK2A2              | 3 |
| hsa00562 | Inositol phosphate metabolism    | 26359 | 74/7466  | 0.034249 | 0.487047 | 0.461681 | PLCG1/PLCB4/<br>INPP5D                | 3 |
| hsa05016 | Huntington disease               | 26420 | 193/7466 | 0.038044 | 0.487047 | 0.461681 | TAF4/SDHA/<br>PLCB4/ATP5A1/<br>DNAH14 | 5 |
| hsa04915 | Estrogen signaling pathway       | 26390 | 137/7466 | 0.042819 | 0.487047 | 0.461681 | ADCY3/PLCB4/<br>KRT23/KRT39           | 4 |
| hsa04146 | Peroxisome DNA replication       | 26359 | 83/7466  | 0.045682 | 0.487047 | 0.461681 | ECH1/PIPOX/<br>MPV17L                 | 3 |
| hsa03030 | TGF-beta signaling pathway       | 26330 | 36/7466  | 0.046803 | 0.487047 | 0.461681 | RNASEH2B/RFC3                         | 2 |
| hsa04350 | Insulin secretion                | 26359 | 85/7466  | 0.04845  | 0.487047 | 0.461681 | TFDP1/TGIF2/<br>NODAL                 | 3 |
| hsa04911 |                                  | 26359 | 85/7466  | 0.04845  | 0.487047 | 0.461681 | ADCY3/PLCB4/<br>CACNA1D               | 3 |

Please browse Full Text version to see the data of Supplementary Tables 6–8.

**Supplementary Table 6.**

**Supplementary Table 7.**

**Supplementary Table 8.**
