# Supplementary material for: Copy number variations primed lncRNAs deregulation contribute to poor prognosis in colorectal cancer
Source: Aging (Albany NY). 2019 Aug 22;11(16):6089–108. doi: 10.18632/aging.102168 (PMC6738420; doi:10.18632/aging.102168)
Supplement: Supplementary Table 1 [file aging-11-102168-s001.xlsx]

## Sheet: Sheet1
ENSG	Symbol
ENSG00000225880	LINC00115
ENSG00000227372	TP73-AS1
ENSG00000242125	SNHG3
ENSG00000197989	SNHG12
ENSG00000203325	ENSG00000203325
ENSG00000237853	ENSG00000237853
ENSG00000243960	ENSG00000243960
ENSG00000203761	MSTO2P
ENSG00000225670	ENSG00000225670
ENSG00000254154	ENSG00000254154
ENSG00000273129	ENSG00000273129
ENSG00000280924	LINC00628
ENSG00000232679	ENSG00000232679
ENSG00000215808	ENSG00000215808
ENSG00000236289	ENSG00000236289
ENSG00000224220	ENSG00000224220
ENSG00000213453	FTH1P3
ENSG00000231826	ENSG00000231826
ENSG00000228079	ENSG00000228079
ENSG00000223859	ENSG00000223859
ENSG00000222041	ENSG00000222041
ENSG00000175772	ENSG00000175772
ENSG00000238057	ZEB2-AS1
ENSG00000224287	MSL3P1
ENSG00000225611	ENSG00000225611
ENSG00000265992	ESRG
ENSG00000241684	ENSG00000241684
ENSG00000243550	ENSG00000243550
ENSG00000241479	ENSG00000241479
ENSG00000228952	ENSG00000228952
ENSG00000250681	ENSG00000250681
ENSG00000237125	ENSG00000237125
ENSG00000250584	ENSG00000250584
ENSG00000250337	ENSG00000250337
ENSG00000248464	ENSG00000248464
ENSG00000250472	ENSG00000250472
ENSG00000233006	ENSG00000233006
ENSG00000197083	ZNF300P1
ENSG00000280916	FOXCUT
ENSG00000272168	CASC15
ENSG00000261068	ENSG00000261068
ENSG00000112715	VEGFA
ENSG00000226453	ENSG00000226453
ENSG00000255389	C6orf3
ENSG00000122548	KIAA0087
ENSG00000224122	POU6F2-AS1
ENSG00000232956	SNHG15
ENSG00000224897	ENSG00000224897
ENSG00000240204	SMKR1
ENSG00000231721	LINC-PINT
ENSG00000253930	ENSG00000253930
ENSG00000253535	ENSG00000253535
ENSG00000253669	ENSG00000253669
ENSG00000248690	HAS2-AS1
ENSG00000147687	TATDN1
ENSG00000253438	ENSG00000253438
ENSG00000253264	ENSG00000253264
ENSG00000247844	ENSG00000247844
ENSG00000254101	ENSG00000254101
ENSG00000253716	ENSG00000253716
ENSG00000171889	ENSG00000171889
ENSG00000240498	CDKN2B-AS1
ENSG00000196730	DAPK1
ENSG00000233256	ENSG00000233256
ENSG00000229404	ENSG00000229404
ENSG00000240996	ENSG00000240996
ENSG00000119969	HELLS
ENSG00000183242	WT1-AS
ENSG00000173727	ENSG00000173727
ENSG00000251562	MALAT1
ENSG00000255980	ENSG00000255980
ENSG00000110092	CCND1
ENSG00000255471	ENSG00000255471
ENSG00000237248	ENSG00000237248
ENSG00000257718	ENSG00000257718
ENSG00000281445	PCBP2-OT1
ENSG00000255737	AGAP2-AS1
ENSG00000246985	ENSG00000246985
ENSG00000260329	ENSG00000260329
ENSG00000256128	ENSG00000256128
ENSG00000133110	POSTN
ENSG00000231473	ENSG00000231473
ENSG00000233610	ENSG00000233610
ENSG00000215417	MIR17HG
ENSG00000272143	ENSG00000272143
ENSG00000198176	TFDP1
ENSG00000139910	NOVA1
ENSG00000258667	ENSG00000258667
ENSG00000227051	C14orf132
ENSG00000259023	ENSG00000259023
ENSG00000259905	PWRN1
ENSG00000259498	ENSG00000259498
ENSG00000258725	ENSG00000258725
ENSG00000261713	ENSG00000261713
ENSG00000263011	ENSG00000263011
ENSG00000262185	ENSG00000262185
ENSG00000260852	FBXL19-AS1
ENSG00000269186	ENSG00000269186
ENSG00000268388	FENDRR
ENSG00000221819	GAS8-AS1
ENSG00000263429	LINC00675
ENSG00000233098	ENSG00000233098
ENSG00000264538	SUZ12P1
ENSG00000260105	AOC4P
ENSG00000263787	ENSG00000263787
ENSG00000234912	ENSG00000234912
ENSG00000265688	MAFG-AS1
ENSG00000265369	ENSG00000265369
ENSG00000227115	ENSG00000227115
ENSG00000214855	APOC1P1
ENSG00000197588	KLKP1
ENSG00000268889	ENSG00000268889
ENSG00000228812	ENSG00000228812
ENSG00000232803	ENSG00000232803
ENSG00000233393	ENSG00000233393
ENSG00000187905	ENSG00000187905
ENSG00000240972	MIF
ENSG00000235385	ENSG00000235385
ENSG00000224294	ENSG00000224294
ENSG00000236751	ENSG00000236751
