# Supplementary material for: Copy number variations primed lncRNAs deregulation contribute to poor prognosis in colorectal cancer
Source: Aging (Albany NY). 2019 Aug 22;11(16):6089–108. doi: 10.18632/aging.102168 (PMC6738420; doi:10.18632/aging.102168)
Supplement: Supplementary Table 2 [file aging-11-102168-s002.xlsx]

## Sheet: Sheet1
ID	Description	GeneRatio	BgRatio	pvalue	p.adjust	qvalue	geneID	Count
hsa05033	Nicotine addiction	16193	40/7466	3.18e-06	0.000330428	0.00028762	GABRG3/GABRG2/CACNA1A/GRIN3A/CHRNB2	5
hsa04911	Insulin secretion	16193	85/7466	0.000130156	0.0067681	0.00589126	ADCYAP1/CAMK2B/ATP1A3/KCNN1/SNAP25	5
hsa04925	Aldosterone synthesis and secretion	16193	96/7466	0.000231184	0.00801437	0.00697607	CAMK2B/CACNA1G/ATP2B3/ATP1A3/POMC	5
hsa04020	Calcium signaling pathway	16224	186/7466	0.000708177	0.0184126	0.0160272	ERBB4/P2RX2/CAMK2B/CACNA1G/ATP2B3/CACNA1A	6
hsa04080	Neuroactive ligand-receptor interaction	16254	277/7466	0.00105727	0.0219913	0.0191422	P2RX2/GABRG3/GABRG2/GRIN3A/CHRNB2/NPFFR2/CGA	7
hsa04261	Adrenergic signaling in cardiomyocytes	16193	144/7466	0.00147605	0.0255849	0.0222702	CAMK2B/ATP2B3/ATP1A3/CACNG7/CACNA2D3	5
hsa04725	Cholinergic synapse	16163	112/7466	0.0041054	0.0609945	0.0530924	CAMK2B/KCNQ2/CACNA1A/CHRNB2	4
hsa04950	Maturity onset diabetes of the young	16103	26/7466	0.0100851	0.123459	0.107464	NEUROD1/PAX4	2
hsa04260	Cardiac muscle contraction	16132	78/7466	0.0106839	0.123459	0.107464	ATP1A3/CACNG7/CACNA2D3	3
hsa04934	Cushing syndrome	16163	154/7466	0.0124592	0.129575	0.112788	WNT3A/CAMK2B/CACNA1G/POMC	4
hsa04727	GABAergic synapse	16132	88/7466	0.0147967	0.139896	0.121772	GABRG3/GABRG2/CACNA1A	3
hsa05032	Morphine addiction	16132	91/7466	0.0161825	0.140248	0.122078	GABRG3/GABRG2/CACNA1A	3
hsa04916	Melanogenesis	16132	101/7466	0.021316	0.170528	0.148435	WNT3A/CAMK2B/POMC	3
hsa04010	MAPK signaling pathway	16193	295/7466	0.0286831	0.182429	0.158795	ERBB4/CACNA1G/CACNG7/CACNA1A/CACNA2D3	5
hsa04024	cAMP signaling pathway	16163	199/7466	0.0289744	0.182429	0.158795	CAMK2B/ATP2B3/ATP1A3/GRIN3A	4
hsa04724	Glutamatergic synapse	16132	114/7466	0.0291809	0.182429	0.158795	SLC1A2/CACNA1A/GRIN3A	3
hsa04930	Type II diabetes mellitus	16103	46/7466	0.0298201	0.182429	0.158795	CACNA1G/CACNA1A	2
hsa04728	Dopaminergic synapse	16132	131/7466	0.0414873	0.239704	0.208649	CAMK2B/CACNA1A/SCN1A	3
