# Supplementary material for: Copy number variations primed lncRNAs deregulation contribute to poor prognosis in colorectal cancer
Source: Aging (Albany NY). 2019 Aug 22;11(16):6089–108. doi: 10.18632/aging.102168 (PMC6738420; doi:10.18632/aging.102168)
Supplement: Supplementary Table 4 [file aging-11-102168-s004.xlsx]

## Sheet: Sheet1
ID	Description	GeneRatio	BgRatio	pvalue	p.adjust	qvalue	geneID	Count
hsa04022	cGMP-PKG signaling pathway	24/287	163/7466	1.13461e-08	2.94999e-06	2.54392e-06	MYL9/SLC8A2/GNAI1/GUCY1A3/SLC8A1/PRKG1/KCNMB2/ATP1A2/MYLK/CNGB1/MRVI1/MEF2C/RGS2/AKT3/EDNRB/TRPC6/PDE5A/AGTR1/CACNA1C/KCNMA1/ADRB2/PDE3A/PDE2A/PLN	24
hsa04020	Calcium signaling pathway	24/287	186/7466	1.52364e-07	1.98073e-05	1.70808e-05	PTGER3/NOS1/PDE1A/PLCD4/SLC8A2/SLC8A1/CACNA1H/HTR2B/MYLK/CAMK2A/TACR1/PTGFR/PDE1B/EDNRB/GNAL/AGTR1/CACNA1C/PDE1C/PRKCB/ADRB2/CHRM2/PLN/RYR3/CCKAR	24
hsa04080	Neuroactive ligand-receptor interaction	29/287	277/7466	7.25502e-07	6.28768e-05	5.42217e-05	PTGER3/CTSG/GRIK5/NR3C1/CHRNB4/TSHB/LPAR1/HTR2B/CHRNA3/VIPR2/GHR/TACR1/CNR1/PTGFR/EDNRB/AGTR1/MCHR2/PTH1R/GALR1/ADRB2/S1PR1/NMUR1/LEP/P2RY14/CHRM2/NPY4R2/CCKAR/PRL/GLRB	29
hsa04713	Circadian entrainment	15/287	96/7466	3.23254e-06	0.000210115	0.000181192	PER3/NOS1/RPS6KA5/KCNJ5/GNG11/GNAI1/GUCY1A3/PRKG1/GNG2/CACNA1H/CAMK2A/CACNA1C/GNG3/PRKCB/RYR3	15
hsa04924	Renin secretion	11/287	65/7466	3.14057e-05	0.0016331	0.0014083	PDE1A/GNAI1/GUCY1A3/AQP1/PDE1B/AGTR1/CACNA1C/PDE1C/KCNMA1/ADRB2/PDE3A	11
hsa04270	Vascular smooth muscle contraction	15/287	121/7466	5.60787e-05	0.00243008	0.00209557	MYL9/ACTG2/GUCY1A3/PPP1R14A/PRKG1/KCNMB2/MYLK/MRVI1/PPP1R12B/CALD1/PLA2G5/AGTR1/CACNA1C/KCNMA1/PRKCB	15
hsa04014	Ras signaling pathway	22/287	232/7466	7.75231e-05	0.00287943	0.00248307	IGF1/GNG11/FGF7/RGL1/GNG2/KITLG/NGFR/FGF10/PAK3/FGFR1/MAPK10/AKT3/TEK/PLA2G5/NGF/ANGPT1/KIT/GNG3/VEGFD/PRKCB/PDGFD/FGF16	22
hsa04728	Dopaminergic synapse	15/287	131/7466	0.000140259	0.0045584	0.00393093	PPP2R3A/KCNJ5/GNG11/GNAI1/KIF5A/GNG2/CAMK2A/MAPK10/AKT3/CALY/GNAL/CACNA1C/GNG3/PRKCB/KIF5C	15
hsa05032	Morphine addiction	12/287	91/7466	0.000172109	0.00497204	0.00428763	PDE4D/PDE1A/KCNJ5/GNG11/GNAI1/GNG2/PDE1B/PDE1C/GNG3/PRKCB/PDE3A/PDE2A	12
hsa05410	Hypertrophic cardiomyopathy (HCM)	11/287	83/7466	0.000306241	0.00693116	0.00597708	IGF1/CACNA2D1/ITGA5/DES/SLC8A1/SGCG/SGCA/CACNA1C/PRKAA2/TPM2/ITGB3	11
hsa04725	Cholinergic synapse	13/287	112/7466	0.000339925	0.00693116	0.00597708	CHRNB4/GNG11/GNAI1/GNG2/SLC18A3/CAMK2A/CHRNA3/KCNQ4/AKT3/CACNA1C/GNG3/PRKCB/CHRM2	13
hsa04015	Rap1 signaling pathway	19/287	206/7466	0.000342001	0.00693116	0.00597708	IGF1/GNAI1/FGF7/LPAR1/KITLG/NGFR/FGF10/FGFR1/AKT3/CNR1/TEK/NGF/ANGPT1/KIT/VEGFD/PRKCB/PDGFD/FGF16/ITGB3	19
hsa04360	Axon guidance	17/287	175/7466	0.000382978	0.00693116	0.00597708	SEMA3G/GNAI1/NTNG1/CFL2/ILK/SLIT3/GDF7/NTN1/CAMK2A/PAK3/EPHA6/CXCL12/EPHA4/TRPC6/SEMA3E/PLXNB3/EPHA3	17
hsa04010	MAPK signaling pathway	24/287	295/7466	0.000393427	0.00693116	0.00597708	IGF1/RPS6KA5/FLNC/FGF7/CACNA2D1/CACNA1H/KITLG/NGFR/FGF10/FGFR1/MEF2C/MAPK10/AKT3/DUSP1/TEK/NGF/CACNA1C/ANGPT1/KIT/VEGFD/PRKCB/PDGFD/FGF16/TNFRSF1A	24
hsa04261	Adrenergic signaling in cardiomyocytes	15/287	144/7466	0.000399875	0.00693116	0.00597708	PPP2R3A/RPS6KA5/SCN1B/GNAI1/SCN7A/CACNA2D1/SLC8A1/ATP1A2/CAMK2A/AKT3/AGTR1/CACNA1C/ADRB2/TPM2/PLN	15
hsa04151	PI3K-Akt signaling pathway	27/287	354/7466	0.000480668	0.00781085	0.00673568	IGF1/PPP2R3A/THBS4/GNG11/FGF7/ITGA5/GNG2/LPAR1/KITLG/NGFR/FGF10/FGFR1/IL2/GHR/AKT3/TEK/NGF/ANGPT1/KIT/GNG3/PRKAA2/VEGFD/PDGFD/CHRM2/FGF16/ITGB3/PRL	27
hsa05414	Dilated cardiomyopathy (DCM)	11/287	90/7466	0.000621879	0.00951109	0.00820188	IGF1/CACNA2D1/ITGA5/DES/SLC8A1/SGCG/SGCA/CACNA1C/TPM2/PLN/ITGB3	11
hsa04371	Apelin signaling pathway	14/287	137/7466	0.000753191	0.0108794	0.00938185	NOS1/SLC8A2/GNG11/GNAI1/SLC8A1/GNG2/MYLK/MEF2C/AKT3/AGTR1/GNG3/PRKAA2/PLIN1/RYR3	14
hsa04923	Regulation of lipolysis in adipocytes	8/287	54/7466	0.000964448	0.0131977	0.011381	PTGER3/GNAI1/TSHB/PRKG1/AKT3/AQP7/PLIN1/ADRB2	8
hsa04925	Aldosterone synthesis and secretion	11/287	96/7466	0.0010749	0.0139737	0.0120502	KCNJ5/KCNK3/CACNA1H/ATP1A2/CAMK2A/CYP11A1/AGTR1/CACNA1C/PRKCB/PDE2A/CYP21A2	11
hsa04916	Melanogenesis	11/287	101/7466	0.00163478	0.0193675	0.0167015	TYRP1/GNAI1/TCF7L1/MITF/KITLG/CAMK2A/EDNRB/KIT/PRKCB/FZD4/FZD1	11
hsa05412	Arrhythmogenic right ventricular cardiomyopathy (ARVC)	9/287	72/7466	0.00163879	0.0193675	0.0167015	TCF7L1/CACNA2D1/ITGA5/DES/SLC8A1/SGCG/SGCA/CACNA1C/ITGB3	9
hsa05205	Proteoglycans in cancer	17/287	201/7466	0.0018243	0.0206225	0.0177838	DCN/IGF1/FLNC/ANK2/ITGA5/CAMK2A/PPP1R12B/FGFR1/CAV1/AKT3/COL21A1/PRKCB/HSPB2/FZD4/TWIST2/ITGB3/FZD1	17
hsa04540	Gap junction	10/287	88/7466	0.00191479	0.0207436	0.0178882	GNAI1/GUCY1A3/TUBB6/PRKG1/LPAR1/HTR2B/TUBB4A/TUBB2A/PRKCB/PDGFD	10
hsa04921	Oxytocin signaling pathway	14/287	152/7466	0.00206577	0.021484	0.0185267	MYL9/KCNJ5/GNAI1/CACNA2D1/GUCY1A3/MYLK/CAMK2A/PPP1R12B/MEF2C/RGS2/CACNA1C/PRKAA2/PRKCB/RYR3	14
hsa00350	Tyrosine metabolism	6/287	36/7466	0.00225253	0.0225253	0.0194247	TYRP1/TPO/AOX1/ADH1A/ADH1B/HPD	6
hsa04927	Cortisol synthesis and secretion	8/287	64/7466	0.00294501	0.0283593	0.0244556	KCNK3/PBX1/CACNA1H/CYP11A1/AGTR1/CACNA1C/MRAP/CYP21A2	8
hsa04024	cAMP signaling pathway	16/287	199/7466	0.00408461	0.0366206	0.0315797	PTGER3/MYL9/PDE4D/GNAI1/ATP1A2/CNGB1/CAMK2A/VIPR2/MAPK10/AKT3/CACNA1C/ADRB2/PDE3A/CHRM2/PLN/FXYD1	16
hsa04510	Focal adhesion	16/287	199/7466	0.00408461	0.0366206	0.0315797	IGF1/MYL9/THBS4/FLNC/ITGA5/ILK/MYLK/PPP1R12B/PAK3/CAV1/MAPK10/AKT3/VEGFD/PRKCB/PDGFD/ITGB3	16
hsa04920	Adipocytokine signaling pathway	8/287	69/7466	0.0047164	0.0408754	0.0352489	SLC2A4/ACACB/MAPK10/AKT3/RXRG/PRKAA2/LEP/TNFRSF1A	8
hsa05218	Melanoma	8/287	72/7466	0.00611558	0.0504742	0.0435263	IGF1/FGF7/MITF/FGF10/FGFR1/AKT3/PDGFD/FGF16	8
hsa04934	Cushing syndrome	13/287	154/7466	0.00621221	0.0504742	0.0435263	GNAI1/TCF7L1/KCNK3/PBX1/CACNA1H/CAMK2A/CYP11A1/AGTR1/CACNA1C/MRAP/FZD4/CYP21A2/FZD1	13
hsa04970	Salivary secretion	9/287	90/7466	0.00746026	0.0587778	0.0506869	NOS1/GUCY1A3/PRKG1/ATP1A2/BST1/KCNMA1/PRKCB/ADRB2/RYR3	9
hsa04810	Regulation of actin cytoskeleton	16/287	213/7466	0.00780699	0.0597005	0.0514827	MYL9/FGF7/ITGA5/CFL2/LPAR1/MYLK/FGF10/PPP1R12B/PAK3/FGFR1/CXCL12/PDGFD/CHRM2/FGF16/ITGB3/ARHGEF4	16
hsa04726	Serotonergic synapse	10/287	115/7466	0.0127835	0.0949631	0.0818912	KCNJ5/GNG11/GNAI1/HTR3A/GNG2/HTR2B/DUSP1/CACNA1C/GNG3/PRKCB	10
hsa04071	Sphingolipid signaling pathway	10/287	118/7466	0.0151222	0.109216	0.094182	PPP2R3A/GNAI1/FCER1A/MAPK10/AKT3/MS4A2/PRKCB/S1PR1/TNFRSF1A/CERS1	10
hsa04012	ErbB signaling pathway	8/287	85/7466	0.0160489	0.112776	0.0972521	NRG2/NRG3/CAMK2A/PAK3/MAPK10/AKT3/PRKCB/BTC	8
hsa04931	Insulin resistance	9/287	107/7466	0.0215797	0.147651	0.127326	SLC2A4/PYGM/ACACB/MAPK10/AKT3/PRKAA2/PRKCB/TNFRSF1A/FOXO1	9
hsa04072	Phospholipase D signaling pathway	11/287	146/7466	0.0247099	0.164733	0.142057	PLPP1/PLPP3/FCER1A/LPAR1/KITLG/AKT3/PTGFR/AGTR1/MS4A2/KIT/PDGFD	11
hsa05224	Breast cancer	11/287	147/7466	0.0258309	0.16707	0.144073	IGF1/PGR/FGF7/TCF7L1/FGF10/FGFR1/AKT3/KIT/FZD4/FGF16/FZD1	11
hsa04730	Long-term depression	6/287	60/7466	0.0269434	0.16707	0.144073	IGF1/NOS1/GNAI1/GUCY1A3/PRKG1/PRKCB	6
hsa04723	Retrograde endocannabinoid signaling	11/287	148/7466	0.0269883	0.16707	0.144073	SLC17A7/KCNJ5/GNG11/GNAI1/GNG2/RIMS1/MAPK10/CNR1/CACNA1C/GNG3/PRKCB	11
hsa04310	Wnt signaling pathway	11/287	149/7466	0.0281827	0.170407	0.14695	TCF7L1/PRICKLE2/ROR2/ROR1/CAMK2A/MAPK10/DAAM2/PRKCB/FZD4/FZD1/PRICKLE1	11
hsa04919	Thyroid hormone signaling pathway	9/287	116/7466	0.0341341	0.201701	0.173937	PLCD4/SLCO1C1/ATP1A2/AKT3/RXRG/PRKCB/PLN/ITGB3/FOXO1	9
hsa04152	AMPK signaling pathway	9/287	120/7466	0.0410698	0.237292	0.204629	IGF1/PPP2R3A/SLC2A4/TBC1D1/ACACB/AKT3/PRKAA2/LEP/FOXO1	9
hsa04911	Insulin secretion	7/287	85/7466	0.0444381	0.249543	0.215193	KCNMB2/ATP1A2/CAMK2A/CACNA1C/KCNMA1/PRKCB/CCKAR	7
hsa05014	Amyotrophic lateral sclerosis (ALS)	5/287	51/7466	0.0451098	0.249543	0.215193	NOS1/NEFH/NEFM/NEFL/TNFRSF1A	5
