# Supplementary material for: Copy number variations primed lncRNAs deregulation contribute to poor prognosis in colorectal cancer
Source: Aging (Albany NY). 2019 Aug 22;11(16):6089–108. doi: 10.18632/aging.102168 (PMC6738420; doi:10.18632/aging.102168)
Supplement: Supplementary Table 7 [file aging-11-102168-s003.xlsx]

## Sheet: sheet1
lncRNA	CNV frequency	PCC	Number of DESubtype
TP73-AS1	0.00884956	0.0312282	6
LOC100132147	0.00442478	0.0346402	6
SNHG3	0.00221239	0.257485	6
SNHG12	0.00442478	0.222125	6
LOC101929536	0.00442478	0.0815802	6
UBE2Q1-AS1	0.00442478	0.164588	5
SMG7-AS1	0.00442478	0.238381	5
LOC101929224	0.00442478	0.0909166	5
LINC00628	0.00442478	0.0338384	5
LOC101929771	0.00663717	0.00278563	5
LOC101927604	0.00442478	0.121608	6
GTF3C2-AS1	0.00221239	0.0123801	5
LOC102723854	0.00884956	0.0475071	6
LOC101927043	0.00442478	0.147252	6
LINC00152	0.00221239	0.0380759	6
LINC01473	0.00663717	0.133364	6
LINC01266	0.00884956	0.0144343	6
CELSR3-AS1	0.00221239	0.170988	5
LINC00882	0.00221239	0.00506023	6
CFAP99	0.00663717	0.13755	6
LOC105377267	0.00442478	0.0651927	5
ARHGEF38-IT1	0.00221239	0.110096	6
PP7080	0.0199115	0.0889544	6
LINC01511	0.0221239	0.105852	6
LINC01021	0.00663717	0.00289617	6
LOC101929745	0.0132743	0.0911545	6
LIFR-AS1	0.0132743	0.0783205	6
FGF10-AS1	0.00663717	0.000637826	6
CASC15	0.00663717	0.101133	6
LOC101927136	0.00221239	0.180856	6
LOC101928307	0.0110619	0.0862254	6
LINC01558	0.00884956	0.106538	5
LOC105375166	0.00884956	0.149742	5
EVX1-AS	0.00442478	0.0492351	6
POU6F2-AS1	0.00442478	0.122671	5
SNHG15	0.00884956	0.381716	6
LINC-PINT	0.00221239	0.0339252	5
KBTBD11-OT1	0.0707965	0.391283	6
RBPMS-AS1	0.0575221	0.347805	6
LOC286178	0.0132743	0.0289656	5
LINC01289	0.0132743	0.0361697	5
RNF139-AS1	0.039823	0.29959	6
PCAT1	0.0619469	0.215283	6
MINCR	0.050885	0.449669	6
ZNF252P-AS1	0.0464602	0.235207	5
LURAP1L-AS1	0.00663717	0.027676	6
CDKN2B-AS1	0.0199115	0.0043505	6
B4GALT1-AS1	0.00442478	0.202835	6
LOC101929331	0.00221239	0.118849	6
LOC105376382	0.00442478	0.0373111	6
MRLN	0.00442478	0.0426069	6
ZMIZ1-AS1	0.00663717	0.144269	5
LINC00858	0.0110619	0.113444	6
SLC22A18AS	0.00663717	0.120813	6
LOC105376671	0.0110619	0.112064	5
WT1-AS	0.00442478	0.0633952	6
LOC100507144	0.00442478	0.0198547	5
MED4-AS1	0.0221239	0.280496	5
LINC00441	0.0221239	0.240793	5
LMO7-AS1	0.0132743	0.189172	6
MIR17HG	0.00884956	0.122806	6
CLDN10-AS1	0.0376106	0.18445	6
FGF14-AS2	0.0221239	0.0599502	6
LINC00640	0.00221239	0.0462144	6
FRMD6-AS2	0.00221239	0.0268886	6
LINC01269	0.00221239	0.176732	6
LINC01146	0.00221239	0.187961	6
LOC101929002	0.00442478	0.0258578	5
C14orf132	0.00442478	0.0442138	6
LINC00524	0.00442478	0.0678315	6
LOC101928134	0.0132743	0.0578351	5
LOC105371184	0.0110619	0.0675281	6
LMF1	0.00884956	0.0271016	6
SSTR5-AS1	0.00884956	0.0632728	5
LOC102724927	0.00663717	0.00193268	5
LINC01569	0.00442478	0.21118	6
LINC01571	0.00884956	0.0695515	6
LOC102723373	0.00442478	0.199651	6
LOC400548	0.00221239	0.110941	6
LINC01082	0.00221239	0.127217	6
FENDRR	0.00221239	0.123676	6
TMEM220-AS1	0.0199115	0.205018	6
LINC00675	0.0199115	0.340102	6
CCDC144NL-AS1	0.0110619	0.0823013	5
LOC101927239	0.0154867	0.0366931	6
LOC146880	0.00442478	0.140363	5
LOC146795	0.0132743	0.0960596	5
SNHG20	0.00442478	0.309729	5
LOC101928710	0.00884956	0.101324	6
LOC101928766	0.00663717	0.154752	6
MAFG-AS1	0.00663717	0.265387	6
LOC729950	0.00221239	0.0228802	6
PCAT18	0.00442478	0.0611809	6
LOC284454	0.0110619	0.156642	5
LOC100505622	0.00221239	0.0130131	5
LINC00658	0.0176991	0.173127	6
FAM182A	0.0243363	0.116906	6
PLCG1-AS1	0.0376106	0.0232251	6
LINC01273	0.0353982	0.206433	6
LINC01270	0.039823	0.217976	6
SLCO4A1-AS1	0.0575221	0.121848	6
UCKL1-AS1	0.050885	0.279296	5
LINC00323	0.00442478	0.182919	5
LOC100507657	0.00663717	0.0419511	6
