# Supplementary material for: Copy number variations primed lncRNAs deregulation contribute to poor prognosis in colorectal cancer
Source: Aging (Albany NY). 2019 Aug 22;11(16):6089–108. doi: 10.18632/aging.102168 (PMC6738420; doi:10.18632/aging.102168)
Supplement: Supplementary Table 8 [file aging-11-102168-s005.xlsx]

## Sheet: Sheet1
ENTREZID	SYMBOL	GENENAME	ENSEMBL	SYMBOL	TYPE	Loc	GENESTATUS	GENETYPE
101927604	LOC101927604	uncharacterized LOC101927604	ENSG00000223393	ENSG00000223393	lncRNA	chr1:230874846-230879015+	NOVEL	antisense
105377267	LOC105377267	uncharacterized LOC105377267	ENSG00000250696	ENSG00000250696	lncRNA	chr4:69182100-69216766+	NOVEL	antisense
401237	CASC15	cancer susceptibility 15 (non-protein coding)	ENSG00000272168	CASC15	lncRNA	chr6:21664772-22214505+	KNOWN	lincRNA
378805	LINC-PINT	"long intergenic non-protein coding RNA, p53 induced transcript"	ENSG00000231721	LINC-PINT	lncRNA	chr7:130941760-131110176-	KNOWN	antisense
100874194	CLDN10-AS1	CLDN10 antisense RNA 1	ENSG00000223392	ENSG00000223392	lncRNA	chr13:95479444-95533910-	NOVEL	antisense
56967	C14orf132	chromosome 14 open reading frame 132	ENSG00000227051	C14orf132	lncRNA	chr14:96039324-96094080+	KNOWN	lincRNA
64788	LMF1	lipase maturation factor 1	ENSG00000260807	ENSG00000260807	lncRNA	chr16:975761-981596-	NOVEL	lincRNA
100289255	TMEM238L	transmembrane protein 238 like	ENSG00000263429	LINC00675	lncRNA	chr17:10794913-10804099-	KNOWN	lincRNA
440416	CCDC144NL-AS1	CCDC144NL antisense RNA 1	ENSG00000233098	ENSG00000233098	lncRNA	chr17:20868433-21002276+	NOVEL	antisense
284454	LOC284454	uncharacterized LOC284454	ENSG00000267519	ENSG00000267519	lncRNA	chr19:13834516-13836289-	NOVEL	lincRNA
